# Supplementary material for: Exploring the ability of triple quadrupole inductively coupled plasma mass spectrometry for the determination of Pu isotopes in environmental samples
Source: Royal Society of Chemistry journal article supplement (doi:10.1039/d1ja00288k), 2021-01-01
Supplement: d1ja00288k1.pdf [file d1ja00288k1.pdf]

1  
2  
3  
4  
5  
6  
7  
8  
9  
10  
11  
12  
13  
14  
15  
16  
17  
18  
19  
20  
21  
22  
23  
24  
25  
26  
27  
28  
29  
30

## Supporting information

### **Exploring the ability of triple quadrupole inductively coupled plasma mass spectrometry for the determination of Pu isotopes in environmental samples**

Wenting Bu<sup>1\*∇</sup>, Mei Gu<sup>1∇</sup>, Xiaotong Ding<sup>1</sup>, Youyi Ni<sup>1</sup>, Xuepeng Shao<sup>1</sup>,  
Xuemei Liu<sup>1</sup>, Chuting Yang<sup>1</sup>, Sheng Hu<sup>1</sup>

<sup>1</sup>Institute of Nuclear Physics and Chemistry,  
China Academy of Engineering Physics,  
Mianyang 621900, China

---

\*Corresponding author

[wtbu@caep.cn](mailto:wtbu@caep.cn)

<sup>∇</sup>These authors contributed equally to this study.

31 **Table S1.** Typical operating conditions of ICP-MS/MS for the measurement of Pu isotopes.

| Instrument parameter       | Operating condition                              |
|----------------------------|--------------------------------------------------|
| Sample uptake rate         | 0.2 mL min <sup>-1</sup>                         |
| RF power                   | 1560 W                                           |
| Sample depth               | 4 mm                                             |
| Carrier gas                | 0.85 mL min <sup>-1</sup>                        |
| Nebulizer                  | TQP-50-A0.5                                      |
| Extraction lens 1          | -24 V                                            |
| Extraction lens 2          | -150 V                                           |
| Omega bias                 | -90 V                                            |
| Omega                      | 7.0 V                                            |
| Q1 entrance                | 0.5 V                                            |
| Q1 outlet                  | -2.0 V                                           |
| Cell focus                 | 4.0 V                                            |
| Cell entrance              | -150 V                                           |
| Cell outlet                | -131 V                                           |
| Deflect                    | -3.2 V                                           |
| Plate bias                 | -94 V                                            |
| He flow                    | 5.0 mL min <sup>-1</sup>                         |
| NH3 flow                   | 30%                                              |
| Octopole bias              | -15 V                                            |
| Octopole RF power          | 180 V                                            |
| Energe discrimination      | -15 V                                            |
| Selected mass at 1st QMS   | 238, 239, 240, 241, 242                          |
| Selected mass at 2nd QMS   | 238, 239, 240, 241, 242                          |
| Accumulation time per mass | 238, 0.2 s; 239, 1 s; 240 5s; 241, 5 s; 242, 1 s |
| Number of replicates       | 5                                                |

32

33

34

35

36

37

38

39

40

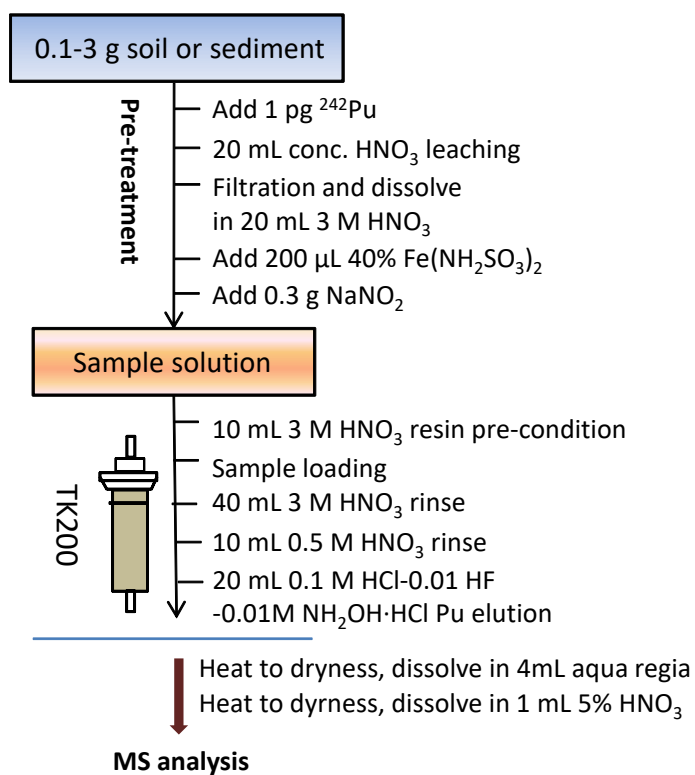

41

42 **Figure S1.** Rapid chemical procedures for Pu separation in soil or sediment samples prior to  
43 ICP-MS/MS measurement.

44

45

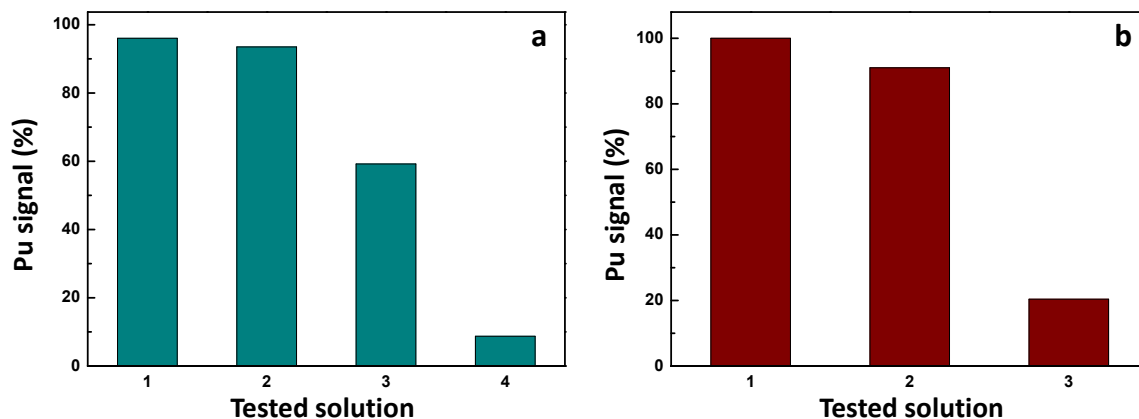

46

47 **Figure S2.** Comparison of sample matrix effects for Pu with various test solutions (Pu signal  
48 was expressed as the signal of Pu for the test solution divided by the signal of Pu for the Pu  
49 standard solution). (a) Mixed solutions with 37 elements: 1. 45 ppb; 2. 100 ppb; 3. 450 ppb;  
50 900 ppb. (b) Mixed solutions with 14 rare earth elements: 1. 100 ppb; 2. 1000 ppb; 8000 ppb.

51

52

53

54

55

56

57

58

59

60

61

62

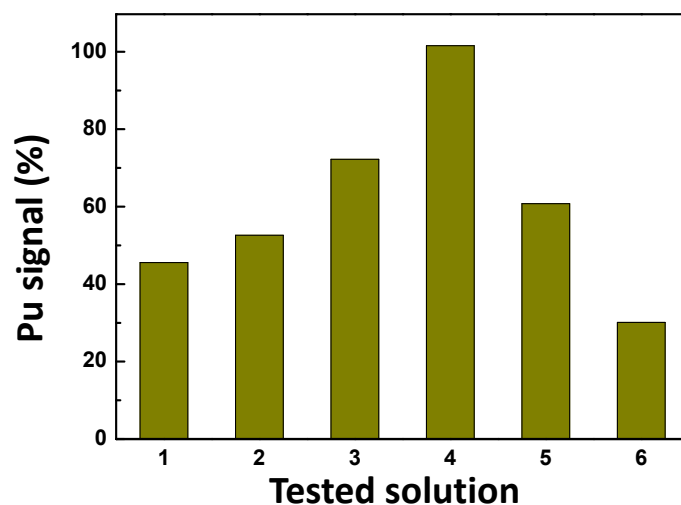

63

64 **Figure S3.** Comparison of sample matrix effects for different Pu elution solutions (Pu signal  
65 was expressed as the signal of Pu for the test solution divided by the signal of Pu for the Pu  
66 standard solution). Test solutions: 1. 20mL 8.5M HCl-0.1 M NH<sub>4</sub>I; 2. 20mL 8.5M HCl-0.05  
67 M NH<sub>4</sub>I; 3. 20mL 8.5M HCl-0.01 M NH<sub>4</sub>I; 4. 20mL 0.1M HCl-0.01M HF-0.01M  
68 NH<sub>2</sub>OH·HCl; 5. 20mL 0.5M HCl-0.1M NH<sub>2</sub>OH·HCl; 6. 20mL HBr.

69

70

71

72

73

74

75

76
